# Supplementary material for: Chirality delivery from a chiral copper(ii) nucleotide complex molecule to its supramolecular architecture
Source: Royal Society of Chemistry journal article supplement (doi:10.1039/c1dt10136f), 2011-01-01
Supplement: c1dt10136f.pdf [file c1dt10136f.pdf]

Electronic Supplementary Information for Dalton Transactions  
This journal is © The Royal Society of Chemistry 2011

## Electronic Supplementary Information

Chirality Delivery from a Chiral Copper(II) Nucleotide Complex  
Molecule to Its Supramolecular Architecture.

**Pei Zhou, Hui Li\***

*Key Laboratory of Clusters Science of Ministry of Education, School of Science, Beijing Institute of Technology, Beijing 100081, P. R. China. Fax: 86-10-82575113; Tel: 86-10-68912667; E-mail: lihui@bit.edu.cn*

### 1) Materials and Instrumentation

All starting materials and solvents used in this work were of analytical grade and used as purchased from Alfa Aesar Chemical Company without further purification. FT-IR spectrum was measured as KBr pellets on a Nicolet Nexus FT-IR spectrometer in the 4000-400  $\text{cm}^{-1}$  region. UV-vis spectrums were obtained from UV-5300PC spectropolarimeter. CD measurements were carried out at 25 °C under a constant flow of nitrogen on a JASCO model J-810 spectropolarimeter. X-ray structure study was carried out in Bruker-AXS CCD X-ray diffraction instrument.

### 2) Experimental procedure

5ml aqueous solution of  $\text{Na}_2\text{GMP}\cdot 6\text{H}_2\text{O}$  (20mg, 0.05mmol) mixed with 2ml methanol solution of  $\text{CuCl}_2\cdot 2\text{H}_2\text{O}$  (8mg, 0.05mmol) and green color precipitation formed. The acidity of the suspend solution was adjusted by 1M HCl and 1M NaOH until the solution becomes clear just right (pH = 5~6). The reaction mixture was stirred for about 30 minutes and then filtered. The light green clavate single crystals suitable for x-ray diffraction were obtained by evaporation at room temperature after a few weeks. The yield is 68%. Anal.Calc. for  $\text{C}_{21}\text{H}_{55}\text{CuN}_{10}\text{NaO}_{30}\text{P}_2$ : C, 23.62%; H, 5.04%; N, 13.21%. Found: C, 23.42%; H, 5.11%; N, 13.01%. IR(KBr,  $\text{cm}^{-1}$ ): 1647  $\nu(\text{C}=\text{O})$ , 1482, 1413  $\nu(\text{N7-C8})$ , 1074  $\nu_a(\text{PO}_3)$ , 992  $\nu_s(\text{PO}_3)$ .

Electronic Supplementary Information for Dalton Transactions  
This journal is © The Royal Society of Chemistry 2011

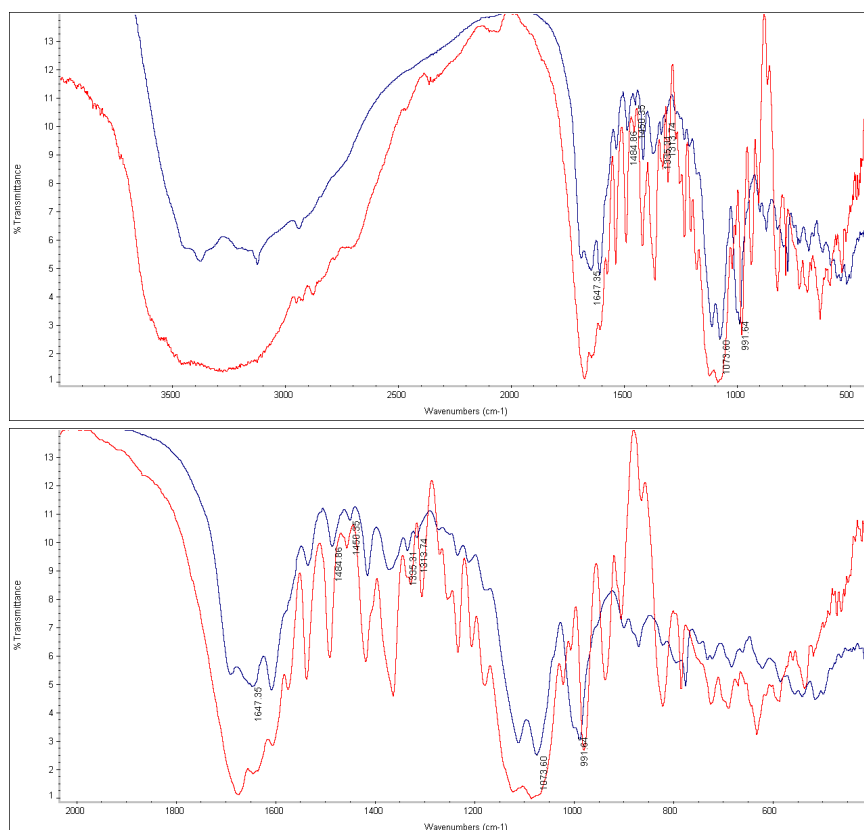

Figure 1S. The FT- IR spectrum of complex 1.(above: 4000-400cm<sup>-1</sup>, below: 2000-400cm<sup>-1</sup>).

### 3) Summary of Na-O Distances (Å) Used in the Analysis.

Table 1S. Summary of Na-O Distances (Å) Used in the Analysis<sup>a</sup>

| <i>CN</i> | <i>no.</i> | <i>min</i> | <i>max</i> | <i>avg(sig)</i> | <i>val</i> |
|-----------|------------|------------|------------|-----------------|------------|
| 4         | 180        | 1.914      | 2.558      | 2.299(74)       | 0.230      |
| 5         | 310        | 2.129      | 2.679      | 2.368(75)       | 0.191      |
| 6         | 648        | 2.130      | 2.978      | 2.415(94)       | 0.168      |
| 7         | 266        | 2.250      | 2.915      | 2.485(111)      | 0.139      |
| 8         | 384        | 2.240      | 2.991      | 2.540(137)      | 0.120      |

*CN* is the coordination number; *no.* is the number of bonds found; *min* is the minimum Na-O distance; *max* is the maximum Na-O distance; *avg* is the average Na-O distance; *sig* is the standard deviation of the average value for the given *CN* and *val* is the valence calculated for the average distance<sup>9</sup>.

Electronic Supplementary Information for Dalton Transactions  
This journal is © The Royal Society of Chemistry 2011

4) UV-vis Spectrum.

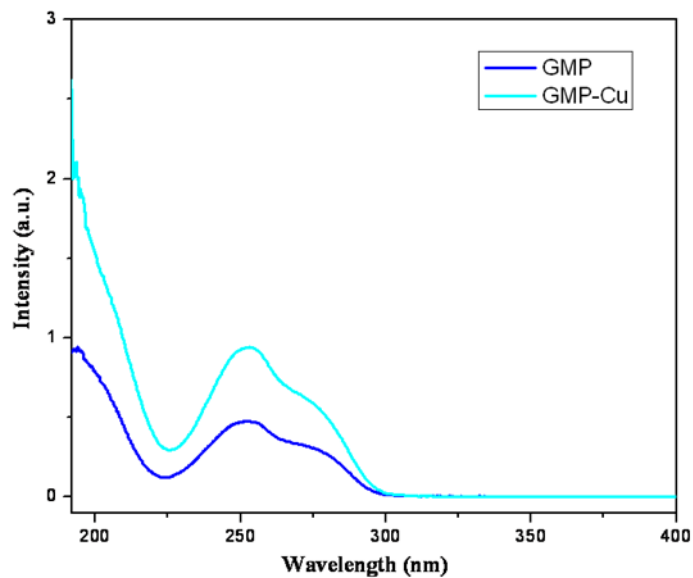

Figure 2S. The UV-vis spectra of complex 1 ( $0.1\text{mg}\cdot\text{ml}^{-1}\text{H}_2\text{O}$ ) and GMP( $0.2\text{mg}\cdot\text{ml}^{-1}$ ) in aqueous solution with the sample cell of 1mm.

$\lambda_{\text{max}}$  of 5'-GMP is 254.4nm which is blue shifted to 254.2nm for 5'-GMP-Cu.

The band at 190 ~ 224nm results due to the presence of the sugar moiety.

Electronic Supplementary Information for Dalton Transactions  
 This journal is © The Royal Society of Chemistry 2011

5) Hydrogen Bonds of the Supramolecular Interaction.

| Table 2S. Hydrogen Bonds of the Supramolecular Interaction |                  |          |          |       |
|------------------------------------------------------------|------------------|----------|----------|-------|
|                                                            | D-H ...A         | d(H...A) | d(D...A) | <DHA  |
| Intrastrand<br>Hydrogen<br>Bonds                           | O3A-H3OA...O6    | 1.897    | 2.693    | 164.0 |
|                                                            | N9A-H9NA...O6    | 1.870    | 2.735    | 171.0 |
|                                                            | N4B-H4NB...O14   | 1.850    | 2.715    | 169.1 |
|                                                            | O11B-H11D...O14  | 2.061    | 2.841    | 160.0 |
|                                                            | O21B-H21E...O15  | 1.910    | 2.724    | 170.9 |
| Interstrand<br>Hydrogen<br>Bonds                           | O20B-H02E...O6   | 1.930    | 2.716    | 161.3 |
|                                                            | O22A-H22D...O4   | 2.290    | 3.033    | 151.6 |
|                                                            | O12A-H12OA...O16 | 1.830    | 2.631    | 167.0 |
|                                                            | O20A-H20OA...O16 | 2.050    | 2.839    | 161.5 |
|                                                            | O4A-H4OA...O8    | 1.825    | 2.650    | 174.0 |

Electronic Supplementary Information for Dalton Transactions  
This journal is © The Royal Society of Chemistry 2011

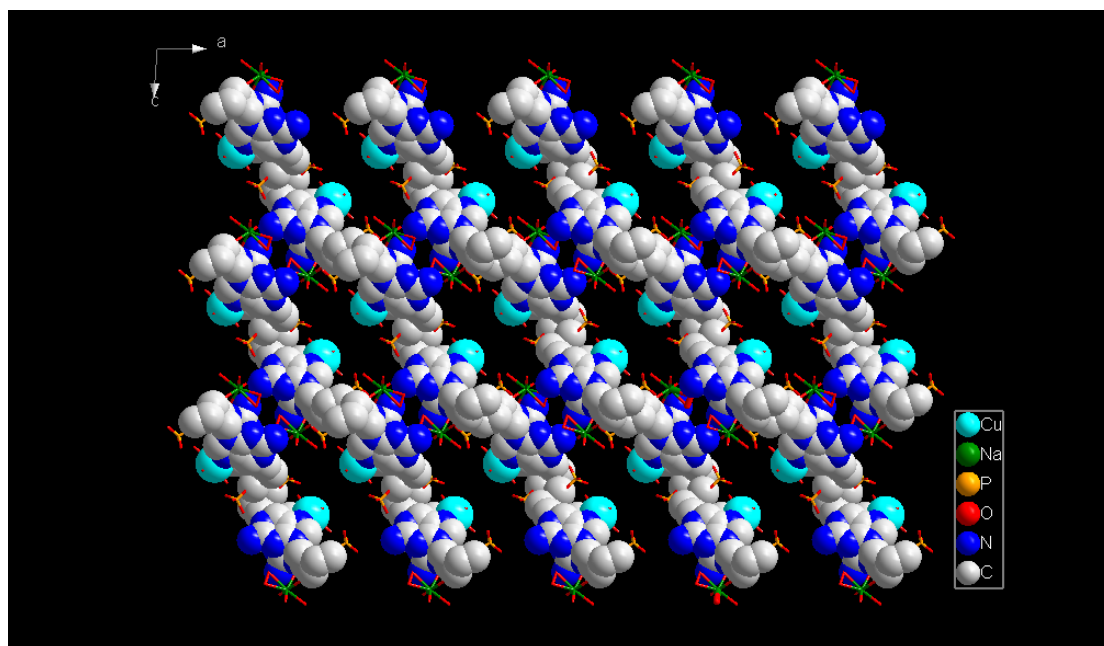

Figure 3S. The model of square grid 2D network architectures of complex 1.

Electronic Supplementary Information for Dalton Transactions  
This journal is © The Royal Society of Chemistry 2011

6) The Intra- and Intermolecular Hydrogen Bonds of the Purdine Rings.

| D-H ...A                          | d(H...A) | d(D...A) | <DHA  |
|-----------------------------------|----------|----------|-------|
| N9-H9N...O6 [ -x+2, y+1/2, -z+1 ] | 1.870    | 2.735    | 171.0 |
| N4-H4N...O14 [ -x+1, y-1/2, -z ]  | 1.850    | 2.716    | 169.1 |
| N10-H0A...O20 [ -x+2, y-1/2, -z ] | 2.220    | 3.002    | 165.0 |
| N10-H0B...O28 [ x+1, y+1, z ]     | 2.200    | 2.956    | 154.6 |
| O19-H19A...O10                    | 1.890    | 2.687    | 161.3 |
| O24-H24B...O2                     | 1.870    | 2.717    | 175.8 |

7) The Description about Water Clusters.

Structural data of H-bonding in water clusters are very important for correctly describing the association of water molecules in different environments <sup>[1]</sup>. It possesses strongly polar hydrogen bonds which are responsible for a set of anomalous physical and chemical properties <sup>[2]</sup>. Novel motifs of water clusters as well as their main classification are reported substantially in recent years<sup>[3-7]</sup>. The formula of complex **1** clearly shows that each molecule contains six solvent water molecules. Two of them are disorder (O27, O29, O30). The occupation ratio of O30 and O30' is 0.5. All these water molecules connected to each other by hydrogen bonds forming water clusters (H<sub>2</sub>O)<sub>6</sub> which include a coordinated water O17. Guest water molecule

O24 is an exception, because it bonded to the host molecule by intramolecular hydrogen bonds. The positions of O27 and O27' (O29 and O29') are practically the same with a tiny displacement and the position of O27 (O29) is more reasonable, which can be demonstrated by the data of hydrogen bonds (Table 4S.). O17 acted as a bridge which connected with guest water molecules O29 (O29') and O30 (O30') forming a catenulate water hexamers with a branch formed with O27. These discrete water hexamers are also extend end-to-head in the 1D chiral supramolecular channels and the aggregates are D6<sup>[4]</sup>.

Electronic Supplementary Information for Dalton Transactions  
This journal is © The Royal Society of Chemistry 2011

The phosphate oxygen atoms ( O9 , O15, O8A, O7B ) and the coordinated water molecules (O21c) of the host molecule present in the inorganic-organic coordination complex can potentially act as hydrogen-bond acceptors, which would interacted with guest water clusters. The water-clusters connected with these O atoms of the host molecules present a ring appearance when viewed from b axis(fig.6S). The length and angle of the hydrogen bonds are listed in table 4S. The water hexamer is characterized by rather regular O-O bonds which is comparable to 2.758Å obtained from the ab initio calculations<sup>[8]</sup> and two lengthy ones. For the latter bonds, R(O30'...O26) = 3.190 and R(O30'...O18A)= 3.296 which implies that the H-bond pattern there is relatively weak. The confine of these values is larger than the range 2.77–2.84 Å <sup>[9]</sup> observed in the ice II phase. Bulk water also shows a short-range order in the O...O X-ray diffraction radial distribution curve of 2.85Å. The difference of O...O distance between the water molecule might arises from its different host environment. What's more, this catenulate water hexamer is higher-energy and less stable comparing with the cyclic water hexamers, but it can be stabilized by the host framework of complex 1.

Electronic Supplementary Information for Dalton Transactions

This journal is © The Royal Society of Chemistry 2011

|     | D-H ...A        | d(D-H) | d(H...A) | <DHA  | d(D...A) |
|-----|-----------------|--------|----------|-------|----------|
| (1) | O29-H29C...O25  | 0.850  | 1.890    | 175.4 | 2.739    |
|     | O29'-H29H...O25 | 0.850  | 2.010    | 166.3 | 2.841    |
|     | O30'-H30F...O26 | 0.850  | 2.350    | 169.7 | 3.190    |
|     | O17-H17A...O29  | 0.820  | 1.810    | 177.8 | 2.628    |
|     | O17-H17A...O29' | 0.820  | 2.210    | 150.9 | 2.950    |
|     | O17-H17B...O30  | 0.850  | 1.950    | 160.7 | 2.763    |
|     | O17-H17B...O30' | 0.850  | 1.970    | 159.7 | 2.785    |



|     |                  |       |       |       |       |
|-----|------------------|-------|-------|-------|-------|
|     | O25-H25C...O9    | 0.850 | 2.150 | 172.8 | 2.999 |
|     | O25-H25D...O15   | 0.850 | 1.830 | 172.3 | 2.680 |
|     | O26-H26C...O21C  | 0.850 | 1.960 | 177.2 | 2.808 |
|     | O26-H26D...O7 B  | 0.850 | 1.910 | 177.2 | 2.758 |
|     | O27-H27C...O8 A  | 0.850 | 1.970 | 170.0 | 2.811 |
| (2) | O27-H27D...O15   | 0.850 | 2.000 | 171.1 | 2.847 |
|     | O27'-H27G...O15  | 0.850 | 1.880 | 167.7 | 2.716 |
|     | O27'-H27H...O8 A | 0.850 | 2.000 | 167.5 | 2.835 |
|     | O29-H29B...O7A   | 0.850 | 1.860 | 147.0 | 2.613 |
|     | O29'-H29E...O7A  | 0.840 | 1.850 | 167.1 | 2.674 |
|     | O30'-H30E...O18  | 0.850 | 2.460 | 170.4 | 3.296 |

Electronic Supplementary Information for Dalton Transactions

This journal is © The Royal Society of Chemistry 2011

**References:**

- (1) Ghosh, S. K.; Bharadwaj, P. K. *Angew. Chem. Int. Ed.* 2004, 43, 3577.
- (2) Ralf L. *Angew. Chem. Int. Ed.* 2001, 40, 1808.
- (3) Mascal, M.; Infantes, L. *Angew. Chem. Int. Ed.* 2006, 45, 32.
- (4) Sun, Z.; Siu, C.K. *Angew. Chem. Int. Ed.* 2006, 45, 4027.
- (5) Mir, M. H.; Vittal, J. J.. *Angew. Chem. Int. Ed.* 2007, 46, 5925.
- (6) Lakshminarayanan, P. S.; Eringathodi S.; Ghosh, P. *Angew. Chem. Int. Ed.* 2006, 45, 3807.

- (7) Ludwig, R.; Appelhagen, A. *Angew. Chem. Int. Ed.* 2005, 44, 811–815.
- (8) Zaworotko, M. J. *Chem. Soc. Rev.* 1994, 23, 283.
- (9) Kryachko E.S. *Chem. Phys. Lett.* 1997, 272, 132.

Electronic Supplementary Information for Dalton Transactions

This journal is © The Royal Society of Chemistry 2011

8) Crystal Data of Complex **1**.

---

Table 5S. Crystal data and structure refinement for complex **1**

---

|                   |                                                                                        |
|-------------------|----------------------------------------------------------------------------------------|
| Empirical formula | C <sub>21</sub> H <sub>53.5</sub> Cu N <sub>10</sub> Na O <sub>30</sub> P <sub>2</sub> |
| Formula weight    | 1074.71                                                                                |
| Temperature       | 103(2) K                                                                               |
| Wavelength        | 0.71073 Å                                                                              |

---

|                                 |                                                                                                           |
|---------------------------------|-----------------------------------------------------------------------------------------------------------|
| Crystal system, space group     | monoclinic, P2 <sub>1</sub>                                                                               |
| Unit cell dimensions            | a = 14.842(3) Å    alpha = 90°<br>b = 8.6829(15) Å    beta = 93.973(3)°<br>c = 16.272(3) Å    gamma = 90° |
| Volume                          | 2091.9(7) Å <sup>3</sup>                                                                                  |
| Z, Calculated density           | 2, 1.706 mg·m <sup>-3</sup>                                                                               |
| Absorption coefficient          | 0.723 mm <sup>-1</sup>                                                                                    |
| F(000)                          | 1119                                                                                                      |
| Crystal size                    | 0.40 x 0.13 x 0.04 mm <sup>3</sup>                                                                        |
| Theta range for data collection | 3.03° to 27.48°.                                                                                          |
| Limiting indices                | -19 ≤ h ≤ 13, -11 ≤ k ≤ 11, -21 ≤ l ≤ 21                                                                  |
| Reflections collected / unique  | 16717 / 9366                                                                                              |
| R <sub>int</sub>                | 0.0275                                                                                                    |
| Completeness to theta = 27.48   | 99.7 %                                                                                                    |
| Absorption correction           | Empirical                                                                                                 |
| Max. and min. transmission      | 0.9717 and 0.7608                                                                                         |
| Refinement method               | Full-matrix least-squares on F <sup>2</sup>                                                               |
| Data / restraints / parameters  | 9366 / 7 / 635                                                                                            |

Electronic Supplementary Information for Dalton Transactions

This journal is © The Royal Society of Chemistry 2011

---

|                                   |                                    |
|-----------------------------------|------------------------------------|
| Goodness-of-fit on F <sup>2</sup> | 0.995                              |
| Final R indices [I > 2σ(I)]       | R1 = 0.0466, wR2 = 0.1159          |
| R indices (all data)              | R1 = 0.0578, wR2 = 0.1228          |
| Absolute structure parameter      | -0.008(11)                         |
| Largest diff. peak and hole       | 1.836 and -0.697e. Å <sup>-3</sup> |

---

Table 6S. Atomic Coordinates ( x 10<sup>4</sup>) and Equivalent Isotropic Displacement Parameters (Å<sup>2</sup> x 10<sup>3</sup>) for Complex **1**. U(eq) is defined as One Third of the Trace of the Orthogonalized U<sub>ij</sub> tensor.

---

|       | x        | y        | z        | U(eq) |
|-------|----------|----------|----------|-------|
| Cu(1) | 6547(1)  | 4055(1)  | 3355(1)  | 15(1) |
| Na(1) | 7835(1)  | 7581(2)  | -1423(1) | 22(1) |
| P(1)  | 8263(1)  | 364(1)   | 5652(1)  | 13(1) |
| P(2)  | 3932(1)  | 7824(1)  | 1592(1)  | 12(1) |
| C(1)  | 7974(3)  | 1745(4)  | 3167(2)  | 16(1) |
| C(2)  | 7482(3)  | 2390(4)  | 1943(2)  | 13(1) |
| C(3)  | 6987(3)  | 2891(4)  | 1213(2)  | 14(1) |
| C(4)  | 8191(3)  | 1628(4)  | 504(2)   | 16(1) |
| C(5)  | 8259(3)  | 1550(4)  | 1856(2)  | 12(1) |
| C(6)  | 9398(3)  | 293(4)   | 2871(2)  | 14(1) |
| C(7)  | 10070(3) | 1212(4)  | 3427(2)  | 15(1) |
| C(8)  | 10556(3) | -75(5)   | 3926(2)  | 16(1) |
| C(9)  | 9824(3)  | -1251(4) | 4018(2)  | 14(1) |
| C(10) | 9351(3)  | -1214(4) | 4810(2)  | 17(1) |
| C(11) | 6759(3)  | 6483(4)  | 2143(2)  | 15(1) |
| C(12) | 8200(3)  | 6746(4)  | 1933(2)  | 13(1) |
| C(13) | 9698(3)  | 6624(4)  | 2013(2)  | 14(1) |
| C(14) | 8897(3)  | 5338(4)  | 3081(2)  | 14(1) |
| C(15) | 8097(2)  | 5843(4)  | 2624(2)  | 11(1) |

---

|       |         |           |         |       |
|-------|---------|-----------|---------|-------|
| C(16) | 7133(2) | 8023(4)   | 896(2)  | 12(1) |
| C(17) | 6611(2) | 7109(4)   | 217(2)  | 13(1) |
| C(18) | 6142(3) | 8403(4)   | -276(2) | 14(1) |
| C(19) | 5896(2) | 9526(4)   | 398(2)  | 12(1) |
| C(20) | 4953(2) | 9409(4)   | 695(2)  | 16(1) |
| C(23) | 592(5)  | 10006(10) | -86(5)  | 74(2) |

Electronic Supplementary Information for Dalton Transactions  
This journal is © The Royal Society of Chemistry 2011

|       |          |          |         |       |
|-------|----------|----------|---------|-------|
| N(1)  | 7313(2)  | 2497(4)  | 2774(2) | 14(1) |
| N(2)  | 8570(2)  | 1138(4)  | 2646(2) | 14(1) |
| N(3)  | 8647(2)  | 1150(4)  | 1164(2) | 16(1) |
| N(4)  | 7416(2)  | 2489(4)  | 510(2)  | 15(1) |
| N(5)  | 8472(2)  | 1315(4)  | -251(2) | 20(1) |
| N(6)  | 7182(2)  | 5691(4)  | 2739(2) | 14(1) |
| N(7)  | 7346(2)  | 7157(4)  | 1643(2) | 13(1) |
| N(8)  | 8963(2)  | 7161(4)  | 1589(2) | 14(1) |
| N(9)  | 9671(2)  | 5736(4)  | 2713(2) | 12(1) |
| N(10) | 10507(2) | 6987(4)  | 1764(2) | 19(1) |
| O(1)  | 9165(2)  | -1022(3) | 3326(1) | 15(1) |
| O(2)  | 6255(2)  | 3600(3)  | 1129(2) | 21(1) |
| O(3)  | 10625(2) | 2106(3)  | 2941(2) | 20(1) |
| O(4)  | 11263(2) | -647(3)  | 3455(2) | 21(1) |

|       |         |          |          |       |
|-------|---------|----------|----------|-------|
| O(5)  | 8982(2) | 277(3)   | 4944(2)  | 17(1) |
| O(6)  | 8755(2) | -177(3)  | 6455(2)  | 15(1) |
| O(7)  | 7493(2) | -716(3)  | 5395(2)  | 22(1) |
| O(8)  | 8000(2) | 2042(3)  | 5673(2)  | 18(1) |
| O(9)  | 6564(2) | 9279(3)  | 1082(2)  | 14(1) |
| O(10) | 8964(2) | 4634(3)  | 3745(2)  | 19(1) |
| O(11) | 7234(2) | 6232(3)  | -214(2)  | 16(1) |
| O(12) | 6790(2) | 9064(4)  | -760(2)  | 17(1) |
| O(13) | 4807(2) | 7921(3)  | 1048(2)  | 14(1) |
| O(14) | 3131(2) | 8397(3)  | 1043(2)  | 14(1) |
| O(15) | 4127(2) | 8864(3)  | 2330(2)  | 17(1) |
| O(16) | 3879(2) | 6143(3)  | 1809(2)  | 17(1) |
| O(17) | 5767(2) | 5652(4)  | 3791(2)  | 26(1) |
| O(18) | 5891(3) | 2385(4)  | 3862(2)  | 37(1) |
| O(19) | 7469(2) | 4308(3)  | 4570(2)  | 22(1) |
| O(20) | 7853(2) | 10024(4) | -2153(2) | 20(1) |
| O(21) | 6469(2) | 6832(3)  | -2326(2) | 26(1) |
| O(22) | 8288(2) | 5035(4)  | -1701(2) | 31(1) |
| O(23) | 9367(4) | 8048(7)  | -1039(4) | 40(1) |
| O(24) | 5054(2) | 3804(4)  | 2310(2)  | 28(1) |
| O(25) | 5816(2) | 9839(4)  | 2721(2)  | 37(1) |
| O(26) | 7246(3) | 6495(5)  | 6160(3)  | 53(1) |

|        |          |          |         |        |
|--------|----------|----------|---------|--------|
| O(27)  | 3770(10) | 7440(20) | 3849(9) | 49(2)  |
| O(28)  | 136(4)   | 9411(6)  | 510(4)  | 81(2)  |
| O(29)  | 6371(4)  | 8424(6)  | 4173(3) | 39(2)  |
| O(30)  | 4994(12) | 8807(19) | 5059(7) | 129(7) |
| O(23') | 9157(6)  | 7631(12) | -322(7) | 40(1)  |

Electronic Supplementary Information for Dalton Transactions  
This journal is © The Royal Society of Chemistry 2011

|        |          |          |         |       |
|--------|----------|----------|---------|-------|
| O(27') | 3627(5)  | 8433(10) | 3888(4) | 49(2) |
| O(29') | 7025(13) | 8287(16) | 3870(9) | 40(6) |
| O(30') | 4531(9)  | 9807(17) | 4599(7) | 90(4) |

---

Table 7S. Bond Lengths [Å] and Angles [deg] for Complex 1.

---

|             |          |
|-------------|----------|
| Cu(1)-O(18) | 1.960(3) |
| Cu(1)-O(17) | 1.969(3) |
| Cu(1)-N(6)  | 2.010(3) |
| Cu(1)-N(1)  | 2.041(3) |
| Cu(1)-O(19) | 2.335(3) |
| Na(1)-O(12) | 2.338(3) |
| Na(1)-O(23) | 2.351(6) |

|              |           |
|--------------|-----------|
| Na(1)-O(22)  | 2.363(4)  |
| Na(1)-O(20)  | 2.432(3)  |
| Na(1)-O(21)  | 2.506(3)  |
| Na(1)-O(11)  | 2.506(3)  |
| Na(1)-O(23') | 2.564(10) |
| P(1)-O(8)    | 1.510(3)  |
| P(1)-O(7)    | 1.515(3)  |
| P(1)-O(6)    | 1.525(3)  |
| P(1)-O(5)    | 1.625(3)  |
| P(2)-O(16)   | 1.505(3)  |
| P(2)-O(15)   | 1.515(3)  |
| P(2)-O(14)   | 1.520(3)  |
| P(2)-O(13)   | 1.625(3)  |
| C(1)-N(1)    | 1.308(5)  |
| C(1)-N(2)    | 1.372(5)  |
| C(1)-H(1)    | 0.9500    |
| C(2)-C(5)    | 1.379(5)  |
| C(2)-N(1)    | 1.396(5)  |
| C(2)-C(3)    | 1.421(5)  |
| C(3)-O(2)    | 1.249(5)  |
| C(3)-N(4)    | 1.391(5)  |
| C(4)-N(3)    | 1.297(5)  |



C(4)-N(5) 1.353(5)

C(4)-N(4) 1.373(5)

C(5)-N(3) 1.346(5)

Electronic Supplementary Information for Dalton Transactions

This journal is © The Royal Society of Chemistry 2011

C(5)-N(2) 1.381(5)

C(6)-O(1) 1.417(5)

C(6)-N(2) 1.457(5)

C(6)-C(7) 1.524(5)

C(6)-H(6) 1.0000

C(7)-O(3) 1.413(5)

C(7)-C(8) 1.533(5)

C(7)-H(7) 1.0000

C(8)-O(4) 1.431(5)

C(8)-C(9) 1.505(5)

C(8)-H(8) 1.0000

C(9)-O(1) 1.453(4)

C(9)-C(10) 1.511(5)

C(9)-H(9) 1.0000

C(10)-O(5) 1.429(4)

C(10)-H(10A) 0.9900

C(10)-H(10B) 0.9900

|             |          |
|-------------|----------|
| C(11)-N(6)  | 1.313(5) |
| C(11)-N(7)  | 1.364(5) |
| C(11)-H(11) | 0.9500   |
| C(12)-N(8)  | 1.347(5) |
| C(12)-N(7)  | 1.370(5) |
| C(12)-C(15) | 1.388(5) |
| C(13)-N(10) | 1.333(5) |
| C(13)-N(8)  | 1.334(5) |
| C(13)-N(9)  | 1.378(5) |
| C(14)-O(10) | 1.240(5) |
| C(14)-N(9)  | 1.376(5) |
| C(14)-C(15) | 1.426(5) |
| C(15)-N(6)  | 1.390(5) |
| C(16)-O(9)  | 1.425(4) |
| C(16)-N(7)  | 1.445(4) |
| C(16)-C(17) | 1.527(5) |
| C(16)-H(16) | 1.0000   |
| C(17)-O(11) | 1.420(4) |
| C(17)-C(18) | 1.521(5) |
| C(17)-H(17) | 1.0000   |
| C(18)-O(12) | 1.407(4) |
| C(18)-C(19) | 1.531(5) |

C(18)-H(18) 1.0000

C(19)-O(9) 1.454(4)

Electronic Supplementary Information for Dalton Transactions  
This journal is © The Royal Society of Chemistry 2011

C(19)-C(20) 1.514(5)

C(19)-H(19) 1.0000

C(20)-O(13) 1.437(4)

C(20)-H(20A) 0.9900

C(20)-H(20B) 0.9900

C(23)-O(28) 1.325(8)

C(23)-H(23A) 0.9800

C(23)-H(23B) 0.9800

C(23)-H(23C) 0.9800

N(4)-H(4N) 0.8800

N(5)-H(5A) 0.8095

N(5)-H(5B) 0.8095

N(9)-H(9N) 0.870(19)

N(10)-H(0A) 0.8055

N(10)-H(0B) 0.8102

O(3)-H(3O) 0.819(10)

O(4)-H(4O) 0.828(10)

O(11)-H(11O) 0.814(10)

|              |         |
|--------------|---------|
| O(12)-H(12O) | 0.81(2) |
| O(17)-H(17A) | 0.8197  |
| O(17)-H(17B) | 0.8490  |
| O(18)-H(18A) | 0.8238  |
| O(18)-H(18B) | 0.8030  |
| O(19)-H(19A) | 0.8259  |
| O(19)-H(19B) | 0.8219  |
| O(20)-H(02A) | 0.8215  |
| O(20)-H(02B) | 0.8191  |
| O(21)-H(21A) | 0.8201  |
| O(21)-H(21B) | 0.8484  |
| O(22)-H(22A) | 0.8147  |
| O(22)-H(22B) | 0.8171  |
| O(23)-H(23F) | 0.8477  |
| O(23)-H(23G) | 0.8418  |
| O(24)-H(24A) | 0.8389  |
| O(24)-H(24B) | 0.8437  |
| O(25)-H(25C) | 0.8499  |
| O(25)-H(25D) | 0.8501  |
| O(26)-H(26C) | 0.8505  |
| O(26)-H(26D) | 0.8500  |
| O(27)-H(27C) | 0.8503  |

O(27)-H(27D) 0.8500

Electronic Supplementary Information for Dalton Transactions  
This journal is © The Royal Society of Chemistry 2011

O(28)-H(28O) 0.8400

O(29)-H(29B) 0.8501

O(29)-H(29C) 0.8496

O(30)-H(30C) 0.8499

O(30)-H(30D) 0.8500

O(23')-H(23E) 0.8501

O(27')-H(27G) 0.8502

O(27')-H(27H) 0.8497

O(29')-H(29E) 0.8438

O(29')-H(29H) 0.8500

O(30')-H(30E) 0.8499

O(30')-H(30F) 0.8501

O(18)-Cu(1)-O(17) 92.75(14)

O(18)-Cu(1)-N(6) 174.97(14)

O(17)-Cu(1)-N(6) 89.40(14)

O(18)-Cu(1)-N(1) 90.78(15)

O(17)-Cu(1)-N(1) 173.48(14)

N(6)-Cu(1)-N(1) 86.66(12)

|                   |            |
|-------------------|------------|
| O(18)-Cu(1)-O(19) | 89.56(13)  |
| O(17)-Cu(1)-O(19) | 87.35(12)  |
| N(6)-Cu(1)-O(19)  | 95.08(12)  |
| N(1)-Cu(1)-O(19)  | 98.16(12)  |
| O(18)-Cu(1)-O(24) | 78.22(13)  |
| O(17)-Cu(1)-O(24) | 78.85(12)  |
| N(6)-Cu(1)-O(24)  | 97.76(11)  |
| N(1)-Cu(1)-O(24)  | 96.53(12)  |
| O(19)-Cu(1)-O(24) | 160.99(9)  |
| O(12)-Na(1)-O(23) | 116.29(17) |
| O(12)-Na(1)-O(22) | 144.13(13) |
| O(23)-Na(1)-O(22) | 85.97(18)  |
| O(12)-Na(1)-O(20) | 76.99(11)  |
| O(23)-Na(1)-O(20) | 86.35(18)  |
| O(22)-Na(1)-O(20) | 135.21(13) |
| O(12)-Na(1)-O(21) | 82.95(11)  |
| O(23)-Na(1)-O(21) | 158.30(17) |
| O(22)-Na(1)-O(21) | 82.77(12)  |
| O(20)-Na(1)-O(21) | 88.64(11)  |
| O(12)-Na(1)-O(11) | 67.12(10)  |
| O(23)-Na(1)-O(11) | 105.18(17) |
| O(22)-Na(1)-O(11) | 80.47(11)  |

|                     |            |
|---------------------|------------|
| O(20)-Na(1)-O(11)   | 143.84(11) |
| O(21)-Na(1)-O(11)   | 91.21(11)  |
| O(12)-Na(1)-O(23')  | 99.7(2)    |
| O(23)-Na(1)-O(23')  | 29.8(3)    |
| O(22)-Na(1)-O(23')  | 86.3(3)    |
| O(20)-Na(1)-O(23')  | 107.0(3)   |
| O(21)-Na(1)-O(23')  | 164.3(3)   |
| O(11)-Na(1)-O(23')  | 75.9(2)    |
| O(12)-Na(1)-H(23G)  | 107.8      |
| O(23)-Na(1)-H(23G)  | 19.6       |
| O(22)-Na(1)-H(23G)  | 101.2      |
| O(20)-Na(1)-H(23G)  | 66.8       |
| O(21)-Na(1)-H(23G)  | 149.1      |
| O(11)-Na(1)-H(23G)  | 119.7      |
| O(23')-Na(1)-H(23G) | 44.6       |
| O(8)-P(1)-O(7)      | 114.34(17) |
| O(8)-P(1)-O(6)      | 112.79(16) |
| O(7)-P(1)-O(6)      | 110.71(16) |
| O(8)-P(1)-O(5)      | 104.11(15) |
| O(7)-P(1)-O(5)      | 107.22(16) |
| O(6)-P(1)-O(5)      | 107.04(15) |
| O(16)-P(2)-O(15)    | 113.73(16) |

|                  |            |
|------------------|------------|
| O(16)-P(2)-O(14) | 113.85(16) |
| O(15)-P(2)-O(14) | 111.73(15) |
| O(16)-P(2)-O(13) | 103.59(15) |
| O(15)-P(2)-O(13) | 106.54(15) |
| O(14)-P(2)-O(13) | 106.52(15) |
| N(1)-C(1)-N(2)   | 112.5(3)   |
| N(1)-C(1)-H(1)   | 123.7      |
| N(2)-C(1)-H(1)   | 123.7      |
| C(5)-C(2)-N(1)   | 110.0(3)   |
| C(5)-C(2)-C(3)   | 117.6(3)   |
| N(1)-C(2)-C(3)   | 132.2(3)   |
| O(2)-C(3)-N(4)   | 118.5(3)   |
| O(2)-C(3)-C(2)   | 129.7(4)   |
| N(4)-C(3)-C(2)   | 111.8(3)   |
| N(3)-C(4)-N(5)   | 120.8(4)   |
| N(3)-C(4)-N(4)   | 124.0(3)   |
| N(5)-C(4)-N(4)   | 115.3(3)   |
| N(3)-C(5)-C(2)   | 129.1(3)   |
| N(3)-C(5)-N(2)   | 125.2(3)   |
| C(2)-C(5)-N(2)   | 105.6(3)   |
| O(1)-C(6)-N(2)   | 107.8(3)   |
| O(1)-C(6)-C(7)   | 106.6(3)   |



|                 |          |
|-----------------|----------|
| N(2)-C(6)-C(7)  | 113.1(3) |
| O(1)-C(6)-H(6)  | 109.8    |
| N(2)-C(6)-H(6)  | 109.8    |
| C(7)-C(6)-H(6)  | 109.8    |
| O(3)-C(7)-C(6)  | 109.8(3) |
| O(3)-C(7)-C(8)  | 115.2(3) |
| C(6)-C(7)-C(8)  | 101.4(3) |
| O(3)-C(7)-H(7)  | 110.1    |
| C(6)-C(7)-H(7)  | 110.1    |
| C(8)-C(7)-H(7)  | 110.1    |
| O(4)-C(8)-C(9)  | 112.3(3) |
| O(4)-C(8)-C(7)  | 107.8(3) |
| C(9)-C(8)-C(7)  | 103.3(3) |
| O(4)-C(8)-H(8)  | 111.1    |
| C(9)-C(8)-H(8)  | 111.1    |
| C(7)-C(8)-H(8)  | 111.1    |
| O(1)-C(9)-C(8)  | 106.4(3) |
| O(1)-C(9)-C(10) | 109.3(3) |
| C(8)-C(9)-C(10) | 116.9(3) |
| O(1)-C(9)-H(9)  | 108.0    |
| C(8)-C(9)-H(9)  | 108.0    |
| C(10)-C(9)-H(9) | 108.0    |

|                     |          |
|---------------------|----------|
| O(5)-C(10)-C(9)     | 110.8(3) |
| O(5)-C(10)-H(10A)   | 109.5    |
| C(9)-C(10)-H(10A)   | 109.5    |
| O(5)-C(10)-H(10B)   | 109.5    |
| C(9)-C(10)-H(10B)   | 109.5    |
| H(10A)-C(10)-H(10B) | 108.1    |
| N(6)-C(11)-N(7)     | 112.0(3) |
| N(6)-C(11)-H(11)    | 124.0    |
| N(7)-C(11)-H(11)    | 124.0    |
| N(8)-C(12)-N(7)     | 124.9(3) |
| N(8)-C(12)-C(15)    | 129.1(3) |
| N(7)-C(12)-C(15)    | 106.0(3) |
| N(10)-C(13)-N(8)    | 118.8(3) |
| N(10)-C(13)-N(9)    | 117.5(3) |
| N(8)-C(13)-N(9)     | 123.7(3) |
| O(10)-C(14)-N(9)    | 119.0(3) |
| O(10)-C(14)-C(15)   | 128.3(4) |
| N(9)-C(14)-C(15)    | 112.8(3) |
| C(12)-C(15)-N(6)    | 109.0(3) |
| C(12)-C(15)-C(14)   | 117.5(3) |
| N(6)-C(15)-C(14)    | 133.4(3) |
| O(9)-C(16)-N(7)     | 108.5(3) |

|                   |          |
|-------------------|----------|
| O(9)-C(16)-C(17)  | 105.8(3) |
| N(7)-C(16)-C(17)  | 114.1(3) |
| O(9)-C(16)-H(16)  | 109.4    |
| N(7)-C(16)-H(16)  | 109.4    |
| C(17)-C(16)-H(16) | 109.4    |
| O(11)-C(17)-C(18) | 115.2(3) |
| O(11)-C(17)-C(16) | 108.7(3) |
| C(18)-C(17)-C(16) | 100.9(3) |
| O(11)-C(17)-H(17) | 110.6    |
| C(18)-C(17)-H(17) | 110.6    |
| C(16)-C(17)-H(17) | 110.6    |
| O(12)-C(18)-C(17) | 106.9(3) |
| O(12)-C(18)-C(19) | 110.3(3) |
| C(17)-C(18)-C(19) | 102.5(3) |
| O(12)-C(18)-H(18) | 112.2    |
| C(17)-C(18)-H(18) | 112.2    |
| C(19)-C(18)-H(18) | 112.2    |
| O(9)-C(19)-C(20)  | 110.0(3) |
| O(9)-C(19)-C(18)  | 105.7(3) |
| C(20)-C(19)-C(18) | 117.2(3) |
| O(9)-C(19)-H(19)  | 107.9    |
| C(20)-C(19)-H(19) | 107.9    |

|                     |          |
|---------------------|----------|
| C(18)-C(19)-H(19)   | 107.9    |
| O(13)-C(20)-C(19)   | 110.9(3) |
| O(13)-C(20)-H(20A)  | 109.5    |
| C(19)-C(20)-H(20A)  | 109.5    |
| O(13)-C(20)-H(20B)  | 109.5    |
| C(19)-C(20)-H(20B)  | 109.5    |
| H(20A)-C(20)-H(20B) | 108.1    |
| O(28)-C(23)-H(23A)  | 109.5    |
| O(28)-C(23)-H(23B)  | 109.5    |
| H(23A)-C(23)-H(23B) | 109.5    |
| O(28)-C(23)-H(23C)  | 109.5    |
| H(23A)-C(23)-H(23C) | 109.5    |
| H(23B)-C(23)-H(23C) | 109.5    |
| C(1)-N(1)-C(2)      | 105.1(3) |
| C(1)-N(1)-Cu(1)     | 121.8(3) |
| C(2)-N(1)-Cu(1)     | 129.6(3) |
| C(1)-N(2)-C(5)      | 106.7(3) |
| C(1)-N(2)-C(6)      | 127.3(3) |
| C(5)-N(2)-C(6)      | 125.9(3) |
| C(4)-N(3)-C(5)      | 112.4(3) |
| C(4)-N(4)-C(3)      | 125.0(3) |
| C(4)-N(4)-H(4N)     | 117.5    |

Electronic Supplementary Information for Dalton Transactions  
This journal is © The Royal Society of Chemistry 2011

|                   |          |
|-------------------|----------|
| C(3)-N(4)-H(4N)   | 117.5    |
| C(4)-N(5)-H(5A)   | 120.0    |
| C(4)-N(5)-H(5B)   | 120.0    |
| H(5A)-N(5)-H(5B)  | 120.0    |
| C(11)-N(6)-C(15)  | 105.8(3) |
| C(11)-N(6)-Cu(1)  | 121.5(3) |
| C(15)-N(6)-Cu(1)  | 129.1(3) |
| C(11)-N(7)-C(12)  | 107.2(3) |
| C(11)-N(7)-C(16)  | 127.8(3) |
| C(12)-N(7)-C(16)  | 124.7(3) |
| C(13)-N(8)-C(12)  | 111.9(3) |
| C(14)-N(9)-C(13)  | 124.9(3) |
| C(14)-N(9)-H(9N)  | 109(3)   |
| C(13)-N(9)-H(9N)  | 126(3)   |
| C(13)-N(10)-H(0A) | 119.7    |
| C(13)-N(10)-H(0B) | 123.1    |
| H(0A)-N(10)-H(0B) | 117.2    |
| C(6)-O(1)-C(9)    | 109.8(3) |
| C(7)-O(3)-H(3O)   | 108(4)   |
| C(8)-O(4)-H(4O)   | 107(4)   |

|                     |          |
|---------------------|----------|
| C(10)-O(5)-P(1)     | 115.3(2) |
| C(16)-O(9)-C(19)    | 109.5(3) |
| C(17)-O(11)-Na(1)   | 114.6(2) |
| C(17)-O(11)-H(11O)  | 115(3)   |
| Na(1)-O(11)-H(11O)  | 94(3)    |
| C(18)-O(12)-Na(1)   | 122.3(3) |
| C(18)-O(12)-H(12O)  | 120(5)   |
| Na(1)-O(12)-H(12O)  | 107(5)   |
| C(20)-O(13)-P(2)    | 114.4(2) |
| Cu(1)-O(17)-H(17A)  | 121.2    |
| Cu(1)-O(17)-H(17B)  | 104.1    |
| H(17A)-O(17)-H(17B) | 109.5    |
| Cu(1)-O(18)-H(18A)  | 111.0    |
| Cu(1)-O(18)-H(18B)  | 117.3    |
| H(18A)-O(18)-H(18B) | 109.4    |
| Cu(1)-O(19)-H(19A)  | 103.6    |
| Cu(1)-O(19)-H(19B)  | 118.4    |
| H(19A)-O(19)-H(19B) | 107.8    |
| Na(1)-O(20)-H(02A)  | 113.7    |
| Na(1)-O(20)-H(02B)  | 111.4    |
| H(02A)-O(20)-H(02B) | 110.4    |

|                      |       |
|----------------------|-------|
| Na(1)-O(21)-H(21A)   | 114.9 |
| Na(1)-O(21)-H(21B)   | 121.0 |
| H(21A)-O(21)-H(21B)  | 108.3 |
| Na(1)-O(22)-H(22A)   | 116.5 |
| Na(1)-O(22)-H(22B)   | 124.7 |
| H(22A)-O(22)-H(22B)  | 111.0 |
| Na(1)-O(23)-H(23F)   | 124.9 |
| Na(1)-O(23)-H(23G)   | 50.1  |
| H(23F)-O(23)-H(23G)  | 109.6 |
| Cu(1)-O(24)-H(24A)   | 125.4 |
| Cu(1)-O(24)-H(24B)   | 84.2  |
| H(24A)-O(24)-H(24B)  | 107.3 |
| H(25C)-O(25)-H(25D)  | 108.2 |
| H(26C)-O(26)-H(26D)  | 108.5 |
| H(27C)-O(27)-H(27D)  | 108.6 |
| C(23)-O(28)-H(28O)   | 109.5 |
| H(29B)-O(29)-H(29C)  | 111.0 |
| H(30C)-O(30)-H(30D)  | 97.8  |
| Na(1)-O(23')-H(23E)  | 143.7 |
| H(23F)-O(23')-H(23E) | 81.9  |
| H(27G)-O(27')-H(27H) | 108.7 |

H(29E)-O(29')-H(29H) 111.1

H(30E)-O(30')-H(30F) 108.0

---

Symmetry transformations used to generate equivalent atoms.



Table 8S. Anisotropic Displacement Parameters ( $\text{Å}^2 \times 10^3$ ) for Complex **1**.  
 The Anisotropic Displacement Factor Exponent Takes the Form:  
 $-2 \pi^2 [ h^2 a^{*2} U_{11} + \dots + 2 h k a^* b^* U_{12} ]$

|       | U11   | U22   | U33   | U23   | U13   | U12   |
|-------|-------|-------|-------|-------|-------|-------|
| Cu(1) | 18(1) | 13(1) | 15(1) | 2(1)  | 3(1)  | -1(1) |
| Na(1) | 22(1) | 20(1) | 25(1) | -1(1) | 6(1)  | 1(1)  |
| P(1)  | 17(1) | 14(1) | 9(1)  | 0(1)  | -1(1) | -3(1) |
| P(2)  | 13(1) | 13(1) | 10(1) | -2(1) | 1(1)  | -2(1) |
| C(1)  | 21(2) | 12(2) | 15(2) | 0(2)  | 0(2)  | -2(2) |
| C(2)  | 16(2) | 10(2) | 14(2) | 1(1)  | 2(1)  | -2(1) |
| C(3)  | 14(2) | 10(2) | 17(2) | 1(2)  | 0(1)  | -2(2) |
| C(4)  | 17(2) | 13(2) | 17(2) | 2(2)  | 3(2)  | -3(2) |
| C(5)  | 16(2) | 9(2)  | 11(2) | 1(1)  | -3(2) | 0(1)  |
| C(6)  | 22(2) | 11(2) | 10(2) | -1(2) | 0(1)  | 4(2)  |
| C(7)  | 20(2) | 12(2) | 14(2) | 2(2)  | -2(2) | 2(2)  |
| C(8)  | 14(2) | 20(2) | 12(2) | -3(2) | -3(1) | 3(2)  |
| C(9)  | 23(2) | 11(2) | 8(2)  | -1(1) | -3(1) | 4(1)  |
| C(10) | 27(2) | 10(2) | 14(2) | 0(1)  | 2(2)  | 4(2)  |
| C(11) | 17(2) | 10(2) | 18(2) | 1(2)  | 1(2)  | 1(2)  |

|       |       |       |       |        |       |        |
|-------|-------|-------|-------|--------|-------|--------|
| C(12) | 14(2) | 12(2) | 14(2) | 0(2)   | -3(2) | 0(2)   |
| C(13) | 15(2) | 14(2) | 13(2) | -2(2)  | -1(1) | -1(2)  |
| C(14) | 20(2) | 9(2)  | 15(2) | -4(1)  | 1(2)  | 2(2)   |
| C(15) | 14(2) | 9(2)  | 11(2) | 0(1)   | -1(1) | -1(1)  |
| C(16) | 11(2) | 11(2) | 13(2) | 3(1)   | -1(1) | -1(1)  |
| C(17) | 11(2) | 15(2) | 11(2) | -1(1)  | -1(1) | -1(1)  |
| C(18) | 14(2) | 16(2) | 11(2) | 2(2)   | -1(1) | -4(2)  |
| C(19) | 9(2)  | 14(2) | 12(2) | 3(1)   | 0(1)  | 0(1)   |
| C(20) | 14(2) | 18(2) | 15(2) | 2(2)   | 3(1)  | 1(1)   |
| C(23) | 60(5) | 71(5) | 92(6) | -11(5) | 11(4) | -24(4) |
| N(1)  | 18(2) | 11(2) | 13(2) | 0(1)   | 2(1)  | -1(1)  |
| N(2)  | 17(2) | 15(2) | 10(1) | 1(1)   | -2(1) | 1(1)   |
| N(3)  | 16(2) | 17(2) | 15(2) | -1(1)  | -1(1) | 1(1)   |
| N(4)  | 15(2) | 18(2) | 11(1) | 4(1)   | -2(1) | 0(1)   |
| N(5)  | 24(2) | 24(2) | 12(2) | 5(1)   | 2(1)  | 3(2)   |
| N(6)  | 18(2) | 10(2) | 13(2) | 4(1)   | -3(1) | -4(1)  |
| N(7)  | 12(1) | 13(2) | 13(2) | 2(1)   | -2(1) | -2(1)  |

Electronic Supplementary Information for Dalton Transactions  
This journal is © The Royal Society of Chemistry 2011

|       |       |       |       |      |       |      |
|-------|-------|-------|-------|------|-------|------|
| N(8)  | 16(2) | 14(2) | 13(2) | 2(1) | 0(1)  | 1(1) |
| N(9)  | 12(1) | 11(2) | 12(2) | 2(1) | -5(1) | 2(1) |
| N(10) | 11(2) | 23(2) | 23(2) | 8(2) | 2(1)  | 2(1) |

|       |       |       |       |       |       |        |
|-------|-------|-------|-------|-------|-------|--------|
| O(1)  | 22(1) | 11(1) | 12(1) | 1(1)  | -5(1) | 0(1)   |
| O(2)  | 16(1) | 27(2) | 20(1) | 2(1)  | -2(1) | 5(1)   |
| O(3)  | 25(2) | 13(1) | 23(2) | -2(1) | 5(1)  | -3(1)  |
| O(4)  | 25(2) | 19(2) | 18(1) | 3(1)  | 4(1)  | 9(1)   |
| O(5)  | 28(2) | 10(1) | 13(1) | 1(1)  | 4(1)  | 2(1)   |
| O(6)  | 16(1) | 18(1) | 10(1) | 1(1)  | -1(1) | 1(1)   |
| O(7)  | 25(1) | 24(2) | 17(1) | 2(1)  | -6(1) | -9(1)  |
| O(8)  | 21(1) | 18(1) | 16(1) | 1(1)  | 0(1)  | 2(1)   |
| O(9)  | 16(1) | 11(1) | 13(1) | -1(1) | -5(1) | 3(1)   |
| O(10) | 20(1) | 21(1) | 17(1) | 9(1)  | -5(1) | 1(1)   |
| O(11) | 14(1) | 14(1) | 18(1) | -3(1) | 3(1)  | 1(1)   |
| O(12) | 17(1) | 19(1) | 15(1) | 8(1)  | 5(1)  | 4(1)   |
| O(13) | 15(1) | 12(1) | 15(1) | 4(1)  | 4(1)  | 0(1)   |
| O(14) | 13(1) | 19(1) | 10(1) | -2(1) | 0(1)  | 0(1)   |
| O(15) | 20(1) | 17(1) | 12(1) | 0(1)  | -2(1) | -1(1)  |
| O(16) | 22(1) | 13(1) | 16(1) | 0(1)  | 3(1)  | -2(1)  |
| O(17) | 24(2) | 24(2) | 30(2) | 3(1)  | 9(1)  | 0(1)   |
| O(18) | 56(2) | 30(2) | 26(2) | 3(2)  | 10(2) | -14(2) |
| O(19) | 23(1) | 25(2) | 18(1) | 3(1)  | 2(1)  | -3(1)  |
| O(20) | 17(1) | 30(2) | 15(1) | -1(1) | 8(1)  | 2(1)   |
| O(21) | 26(2) | 17(2) | 35(2) | 1(1)  | 3(1)  | -2(1)  |
| O(22) | 27(2) | 21(2) | 46(2) | -6(2) | 23(2) | -3(1)  |

|        |         |         |       |        |        |         |
|--------|---------|---------|-------|--------|--------|---------|
| O(23)  | 25(2)   | 49(3)   | 44(3) | -7(3)  | 0(2)   | 3(2)    |
| O(24)  | 36(2)   | 25(2)   | 24(2) | 3(1)   | 6(1)   | 6(1)    |
| O(25)  | 36(2)   | 41(2)   | 32(2) | -4(2)  | -6(2)  | -13(2)  |
| O(26)  | 68(3)   | 42(2)   | 53(2) | 8(2)   | 25(2)  | -2(2)   |
| O(27)  | 46(3)   | 65(4)   | 39(3) | -14(4) | 19(2)  | -16(4)  |
| O(28)  | 83(4)   | 69(4)   | 94(4) | 3(3)   | 29(3)  | 12(3)   |
| O(29)  | 49(4)   | 37(3)   | 27(3) | 10(2)  | -16(3) | -18(3)  |
| O(30)  | 201(14) | 151(13) | 46(5) | 46(7)  | 86(8)  | 109(12) |
| O(23') | 25(2)   | 49(3)   | 44(3) | -7(3)  | 0(2)   | 3(2)    |
| O(27') | 46(3)   | 65(4)   | 39(3) | -14(4) | 19(2)  | -16(4)  |
| O(29') | 60(13)  | 34(8)   | 24(7) | -19(6) | -15(8) | 4(7)    |
| O(30') | 93(9)   | 118(10) | 66(7) | 1(7)   | 47(7)  | 5(8)    |

---

Electronic Supplementary Information for Dalton Transactions  
This journal is © The Royal Society of Chemistry 2011

Table 9S. Hydrogen Coordinates ( $\times 10^4$ ) and Isotropic Displacement Parameters ( $\text{Å}^2 \times 10^3$ ) for Complex **1**.

---

| x | y | z | U(eq) |
|---|---|---|-------|
|---|---|---|-------|

---

|        |           |           |          |        |
|--------|-----------|-----------|----------|--------|
| H(1)   | 8035      | 1632      | 3749     | 19     |
| H(6)   | 9688      | -33       | 2363     | 17     |
| H(7)   | 9740      | 1894      | 3800     | 18     |
| H(8)   | 10802     | 310       | 4476     | 19     |
| H(9)   | 10096     | -2297     | 3963     | 17     |
| H(10A) | 8860      | -1988     | 4784     | 20     |
| H(10B) | 9785      | -1485     | 5277     | 20     |
| H(11)  | 6121      | 6577      | 2068     | 18     |
| H(16)  | 7703      | 8428      | 684      | 14     |
| H(17)  | 6157      | 6420      | 456      | 15     |
| H(18)  | 5598      | 8033      | -617     | 17     |
| H(19)  | 5976      | 10596     | 188      | 14     |
| H(20A) | 4870      | 10217     | 1113     | 19     |
| H(20B) | 4503      | 9585      | 227      | 19     |
| H(23A) | 896       | 9179      | -369     | 89     |
| H(23B) | 1042      | 10735     | 150      | 89     |
| H(23C) | 173       | 10544     | -481     | 89     |
| H(9N)  | 10140(20) | 5400(50)  | 3010(20) | 9(10)  |
| H(3O)  | 10730(40) | 2920(30)  | 3190(30) | 31(14) |
| H(4O)  | 11470(30) | -1420(40) | 3700(30) | 36(16) |
| H(11O) | 7020(30)  | 5530(40)  | -490(20) | 21(13) |

|        |          |          |           |        |
|--------|----------|----------|-----------|--------|
| H(12O) | 6650(50) | 9790(60) | -1060(40) | 80(20) |
| H(4N)  | 7171     | 2812     | 33        | 18     |
| H(5A)  | 8930(19) | 820(20)  | -295(3)   | 24     |
| H(5B)  | 8182(12) | 1619(13) | -659(17)  | 24     |
| H(0A)  | 10949    | 6538     | 1954      | 23     |
| H(0B)  | 10580    | 7616     | 1407      | 23     |
| H(17A) | 5959     | 6519     | 3898      | 31     |
| H(17B) | 5579     | 5249     | 4222      | 31     |
| H(18A) | 5768     | 1691     | 3528      | 44     |
| H(18B) | 5447     | 2614     | 4089      | 44     |
| H(19A) | 7968     | 4529     | 4407      | 26     |
| H(19B) | 7536     | 3556     | 4875      | 26     |
| H(02A) | 8009     | 9949     | -2626     | 24     |
| H(02B) | 7366     | 10466    | -2150     | 24     |

Electronic Supplementary Information for Dalton Transactions  
This journal is © The Royal Society of Chemistry 2011

|        |      |      |       |    |
|--------|------|------|-------|----|
| H(21A) | 6349 | 5910 | -2326 | 31 |
| H(21B) | 5980 | 7333 | -2315 | 31 |
| H(22A) | 7938 | 4352 | -1593 | 37 |
| H(22B) | 8586 | 4785 | -2083 | 37 |
| H(23F) | 9563 | 8497 | -599  | 47 |
| H(23G) | 8983 | 8612 | -1297 | 47 |

|        |      |       |      |     |
|--------|------|-------|------|-----|
| H(24A) | 4685 | 4515  | 2192 | 34  |
| H(24B) | 5427 | 3790  | 1942 | 34  |
| H(25C) | 6073 | 9709  | 2275 | 44  |
| H(25D) | 5270 | 9549  | 2642 | 44  |
| H(26C) | 7013 | 6631  | 6617 | 64  |
| H(26D) | 7317 | 7370  | 5939 | 64  |
| H(27C) | 3213 | 7362  | 3936 | 59  |
| H(27D) | 3814 | 7865  | 3383 | 59  |
| H(28O) | -10  | 10116 | 828  | 97  |
| H(29B) | 6838 | 8843  | 4408 | 46  |
| H(29C) | 6227 | 8851  | 3712 | 46  |
| H(30C) | 5423 | 9429  | 4989 | 155 |
| H(30D) | 5168 | 8078  | 4759 | 155 |
| H(23E) | 9360 | 8077  | 118  | 47  |
| H(27G) | 3710 | 8503  | 3378 | 59  |
| H(27H) | 3121 | 7999  | 3941 | 59  |
| H(29E) | 7130 | 8728  | 4329 | 48  |
| H(29H) | 6729 | 8871  | 3530 | 48  |
| H(30E) | 4935 | 10404 | 4436 | 108 |
| H(30F) | 4019 | 10156 | 4420 | 108 |

---

Electronic Supplementary Information for Dalton Transactions  
This journal is © The Royal Society of Chemistry 2011

Table 10S. Torsion Angles [deg] for Complex 1.

---

|                     |           |
|---------------------|-----------|
| C(5)-C(2)-C(3)-O(2) | 176.7(4)  |
| N(1)-C(2)-C(3)-O(2) | 1.1(7)    |
| C(5)-C(2)-C(3)-N(4) | -2.9(5)   |
| N(1)-C(2)-C(3)-N(4) | -178.4(4) |
| N(1)-C(2)-C(5)-N(3) | 178.3(4)  |
| C(3)-C(2)-C(5)-N(3) | 1.9(6)    |
| N(1)-C(2)-C(5)-N(2) | 0.0(4)    |
| C(3)-C(2)-C(5)-N(2) | -176.5(3) |
| O(1)-C(6)-C(7)-O(3) | 154.1(3)  |
| N(2)-C(6)-C(7)-O(3) | -87.7(4)  |
| O(1)-C(6)-C(7)-C(8) | 31.8(4)   |
| N(2)-C(6)-C(7)-C(8) | 150.1(3)  |
| O(3)-C(7)-C(8)-O(4) | -33.7(4)  |
| C(6)-C(7)-C(8)-O(4) | 84.7(4)   |
| O(3)-C(7)-C(8)-C(9) | -152.7(3) |
| C(6)-C(7)-C(8)-C(9) | -34.3(4)  |
| O(4)-C(8)-C(9)-O(1) | -90.3(3)  |
| C(7)-C(8)-C(9)-O(1) | 25.5(4)   |



|                         |           |
|-------------------------|-----------|
| O(4)-C(8)-C(9)-C(10)    | 147.4(3)  |
| C(7)-C(8)-C(9)-C(10)    | -96.8(4)  |
| O(1)-C(9)-C(10)-O(5)    | -65.4(4)  |
| C(8)-C(9)-C(10)-O(5)    | 55.4(4)   |
| N(8)-C(12)-C(15)-N(6)   | -178.5(4) |
| N(7)-C(12)-C(15)-N(6)   | 1.1(4)    |
| N(8)-C(12)-C(15)-C(14)  | 4.3(6)    |
| N(7)-C(12)-C(15)-C(14)  | -176.1(3) |
| O(10)-C(14)-C(15)-C(12) | 173.8(4)  |
| N(9)-C(14)-C(15)-C(12)  | -5.1(5)   |
| O(10)-C(14)-C(15)-N(6)  | -2.5(7)   |
| N(9)-C(14)-C(15)-N(6)   | 178.6(4)  |
| O(9)-C(16)-C(17)-O(11)  | 157.8(3)  |
| N(7)-C(16)-C(17)-O(11)  | -82.9(4)  |
| O(9)-C(16)-C(17)-C(18)  | 36.3(3)   |
| N(7)-C(16)-C(17)-C(18)  | 155.6(3)  |
| O(11)-C(17)-C(18)-O(12) | -38.7(4)  |
| C(16)-C(17)-C(18)-O(12) | 78.1(3)   |
| O(11)-C(17)-C(18)-C(19) | -154.8(3) |
| C(16)-C(17)-C(18)-C(19) | -38.0(3)  |

|                         |           |
|-------------------------|-----------|
| O(12)-C(18)-C(19)-O(9)  | -86.1(3)  |
| C(17)-C(18)-C(19)-O(9)  | 27.5(4)   |
| O(12)-C(18)-C(19)-C(20) | 151.0(3)  |
| C(17)-C(18)-C(19)-C(20) | -95.5(4)  |
| O(9)-C(19)-C(20)-O(13)  | -59.5(4)  |
| C(18)-C(19)-C(20)-O(13) | 61.3(4)   |
| N(2)-C(1)-N(1)-C(2)     | -0.3(4)   |
| N(2)-C(1)-N(1)-Cu(1)    | -161.1(3) |
| C(5)-C(2)-N(1)-C(1)     | 0.2(4)    |
| C(3)-C(2)-N(1)-C(1)     | 176.0(4)  |
| C(5)-C(2)-N(1)-Cu(1)    | 158.9(3)  |
| C(3)-C(2)-N(1)-Cu(1)    | -25.3(6)  |
| O(18)-Cu(1)-N(1)-C(1)   | -76.1(3)  |
| O(17)-Cu(1)-N(1)-C(1)   | 161.2(11) |
| N(6)-Cu(1)-N(1)-C(1)    | 108.3(3)  |
| O(19)-Cu(1)-N(1)-C(1)   | 13.6(3)   |
| O(24)-Cu(1)-N(1)-C(1)   | -154.3(3) |
| O(18)-Cu(1)-N(1)-C(2)   | 128.3(3)  |
| O(17)-Cu(1)-N(1)-C(2)   | 5.5(15)   |
| N(6)-Cu(1)-N(1)-C(2)    | -47.4(3)  |
| O(19)-Cu(1)-N(1)-C(2)   | -142.1(3) |
| O(24)-Cu(1)-N(1)-C(2)   | 50.0(3)   |

|                       |           |
|-----------------------|-----------|
| N(1)-C(1)-N(2)-C(5)   | 0.3(4)    |
| N(1)-C(1)-N(2)-C(6)   | 177.2(3)  |
| N(3)-C(5)-N(2)-C(1)   | -178.6(4) |
| C(2)-C(5)-N(2)-C(1)   | -0.2(4)   |
| N(3)-C(5)-N(2)-C(6)   | 4.4(6)    |
| C(2)-C(5)-N(2)-C(6)   | -177.2(3) |
| O(1)-C(6)-N(2)-C(1)   | 59.1(5)   |
| C(7)-C(6)-N(2)-C(1)   | -58.5(5)  |
| O(1)-C(6)-N(2)-C(5)   | -124.6(4) |
| C(7)-C(6)-N(2)-C(5)   | 117.9(4)  |
| N(5)-C(4)-N(3)-C(5)   | -179.2(4) |
| N(4)-C(4)-N(3)-C(5)   | 2.1(5)    |
| C(2)-C(5)-N(3)-C(4)   | -1.2(6)   |
| N(2)-C(5)-N(3)-C(4)   | 176.8(4)  |
| N(3)-C(4)-N(4)-C(3)   | -3.9(6)   |
| N(5)-C(4)-N(4)-C(3)   | 177.3(3)  |
| O(2)-C(3)-N(4)-C(4)   | -175.6(3) |
| C(2)-C(3)-N(4)-C(4)   | 4.0(5)    |
| N(7)-C(11)-N(6)-C(15) | -0.3(4)   |

Electronic Supplementary Information for Dalton Transactions  
This journal is © The Royal Society of Chemistry 2011

|                       |           |
|-----------------------|-----------|
| N(7)-C(11)-N(6)-Cu(1) | -160.6(3) |
|-----------------------|-----------|

|                        |            |
|------------------------|------------|
| C(12)-C(15)-N(6)-C(11) | -0.5(4)    |
| C(14)-C(15)-N(6)-C(11) | 176.0(4)   |
| C(12)-C(15)-N(6)-Cu(1) | 157.8(3)   |
| C(14)-C(15)-N(6)-Cu(1) | -25.7(6)   |
| O(18)-Cu(1)-N(6)-C(11) | 50(2)      |
| O(17)-Cu(1)-N(6)-C(11) | -65.0(3)   |
| N(1)-Cu(1)-N(6)-C(11)  | 109.8(3)   |
| O(19)-Cu(1)-N(6)-C(11) | -152.3(3)  |
| O(24)-Cu(1)-N(6)-C(11) | 13.7(3)    |
| O(18)-Cu(1)-N(6)-C(15) | -105.0(18) |
| O(17)-Cu(1)-N(6)-C(15) | 139.7(3)   |
| N(1)-Cu(1)-N(6)-C(15)  | -45.5(3)   |
| O(19)-Cu(1)-N(6)-C(15) | 52.4(3)    |
| O(24)-Cu(1)-N(6)-C(15) | -141.7(3)  |
| N(6)-C(11)-N(7)-C(12)  | 1.0(4)     |
| N(6)-C(11)-N(7)-C(16)  | 175.3(3)   |
| N(8)-C(12)-N(7)-C(11)  | 178.4(4)   |
| C(15)-C(12)-N(7)-C(11) | -1.2(4)    |
| N(8)-C(12)-N(7)-C(16)  | 3.8(6)     |
| C(15)-C(12)-N(7)-C(16) | -175.8(3)  |
| O(9)-C(16)-N(7)-C(11)  | 57.3(5)    |
| C(17)-C(16)-N(7)-C(11) | -60.5(5)   |

|                        |           |
|------------------------|-----------|
| O(9)-C(16)-N(7)-C(12)  | -129.3(4) |
| C(17)-C(16)-N(7)-C(12) | 113.0(4)  |
| N(10)-C(13)-N(8)-C(12) | -177.6(4) |
| N(9)-C(13)-N(8)-C(12)  | 0.7(5)    |
| N(7)-C(12)-N(8)-C(13)  | 178.6(4)  |
| C(15)-C(12)-N(8)-C(13) | -1.8(6)   |
| O(10)-C(14)-N(9)-C(13) | -174.4(3) |
| C(15)-C(14)-N(9)-C(13) | 4.6(5)    |
| N(10)-C(13)-N(9)-C(14) | 175.9(4)  |
| N(8)-C(13)-N(9)-C(14)  | -2.6(6)   |
| N(2)-C(6)-O(1)-C(9)    | -138.6(3) |
| C(7)-C(6)-O(1)-C(9)    | -16.9(4)  |
| C(8)-C(9)-O(1)-C(6)    | -5.7(4)   |
| C(10)-C(9)-O(1)-C(6)   | 121.3(3)  |
| C(9)-C(10)-O(5)-P(1)   | 166.3(2)  |
| O(8)-P(1)-O(5)-C(10)   | 179.1(3)  |
| O(7)-P(1)-O(5)-C(10)   | -59.4(3)  |
| O(6)-P(1)-O(5)-C(10)   | 59.5(3)   |

Electronic Supplementary Information for Dalton Transactions  
This journal is © The Royal Society of Chemistry 2011

|                        |           |
|------------------------|-----------|
| N(7)-C(16)-O(9)-C(19)  | -142.8(3) |
| C(17)-C(16)-O(9)-C(19) | -19.9(4)  |

|                          |           |
|--------------------------|-----------|
| C(20)-C(19)-O(9)-C(16)   | 122.5(3)  |
| C(18)-C(19)-O(9)-C(16)   | -4.9(4)   |
| C(18)-C(17)-O(11)-Na(1)  | 22.2(4)   |
| C(16)-C(17)-O(11)-Na(1)  | -90.1(3)  |
| O(12)-Na(1)-O(11)-C(17)  | -1.3(2)   |
| O(23)-Na(1)-O(11)-C(17)  | 111.3(3)  |
| O(22)-Na(1)-O(11)-C(17)  | -165.6(2) |
| O(20)-Na(1)-O(11)-C(17)  | 6.2(3)    |
| O(21)-Na(1)-O(11)-C(17)  | -83.1(2)  |
| O(23')-Na(1)-O(11)-C(17) | 105.8(3)  |
| C(17)-C(18)-O(12)-Na(1)  | 40.6(4)   |
| C(19)-C(18)-O(12)-Na(1)  | 151.3(2)  |
| O(23)-Na(1)-O(12)-C(18)  | -119.3(3) |
| O(22)-Na(1)-O(12)-C(18)  | 4.0(4)    |
| O(20)-Na(1)-O(12)-C(18)  | 161.5(3)  |
| O(21)-Na(1)-O(12)-C(18)  | 71.3(3)   |
| O(11)-Na(1)-O(12)-C(18)  | -23.0(2)  |
| O(23')-Na(1)-O(12)-C(18) | -93.1(3)  |
| C(19)-C(20)-O(13)-P(2)   | 164.9(2)  |
| O(16)-P(2)-O(13)-C(20)   | 174.3(2)  |
| O(15)-P(2)-O(13)-C(20)   | -65.4(3)  |
| O(14)-P(2)-O(13)-C(20)   | 54.0(3)   |

---

Symmetry transformations used to generate equivalent atoms.

Table 11S. Hydrogen bonds for Complex 1 [ $\text{\AA}$  and deg.].

---

| D-H...A              | d(D-H) | d(H...A) | d(D...A)  | <(DHA) |
|----------------------|--------|----------|-----------|--------|
| O(19)-H(19A)...O(10) | 0.83   | 1.89     | 2.687(4)  | 161.3  |
| O(19)-H(19B)...O(8)  | 0.82   | 1.94     | 2.741(4)  | 164.7  |
| O(23)-H(23G)...O(20) | 0.84   | 2.44     | 3.273(7)  | 173.9  |
| O(24)-H(24A)...O(16) | 0.84   | 1.93     | 2.762(4)  | 174.2  |
| O(24)-H(24B)...O(2)  | 0.84   | 1.87     | 2.717(4)  | 175.8  |
| O(25)-H(25C)...O(9)  | 0.85   | 2.15     | 2.999(4)  | 172.8  |
| O(25)-H(25D)...O(15) | 0.85   | 1.83     | 2.680(4)  | 172.3  |
| O(27)-H(27D)...O(15) | 0.85   | 2.00     | 2.847(15) | 171.1  |
| O(29)-H(29C)...O(25) | 0.85   | 1.89     | 2.739(6)  | 175.4  |

Electronic Supplementary Information for Dalton Transactions

This journal is © The Royal Society of Chemistry 2011

|                       |      |      |           |       |
|-----------------------|------|------|-----------|-------|
| O(17)-H(17A)...O(29)  | 0.82 | 1.81 | 2.628(6)  | 177.8 |
| O(17)-H(17A)...O(29') | 0.82 | 2.21 | 2.950(17) | 150.9 |
| O(27')-H(27G)...O(15) | 0.85 | 1.88 | 2.716(7)  | 167.7 |
| O(29')-H(29H)...O(25) | 0.85 | 2.01 | 2.841(15) | 166.3 |

|                          |           |           |           |        |
|--------------------------|-----------|-----------|-----------|--------|
| N(9)-H(9N)...O(6)#1      | 0.870(19) | 1.87(2)   | 2.735(4)  | 171(4) |
| O(3)-H(3O)...O(6)#1      | 0.819(10) | 1.897(18) | 2.693(4)  | 164(5) |
| O(11)-H(11O)...O(14)#2   | 0.814(10) | 2.061(19) | 2.841(4)  | 160(5) |
| N(4)-H(4N)...O(14)#2     | 0.88      | 1.85      | 2.716(4)  | 169.1  |
| O(21)-H(21A)...O(15)#2   | 0.82      | 1.91      | 2.724(4)  | 170.9  |
| O(22)-H(22A)...O(14)#2   | 0.81      | 2.05      | 2.814(4)  | 155.8  |
| O(12)-H(12O)...O(16)#3   | 0.81(2)   | 1.83(3)   | 2.631(4)  | 167(8) |
| O(20)-H(02B)...O(16)#3   | 0.82      | 2.05      | 2.839(4)  | 161.5  |
| O(21)-H(21B)...O(24)#3   | 0.85      | 2.00      | 2.838(4)  | 171.1  |
| O(4)-H(4O)...O(8)#4      | 0.828(10) | 1.825(12) | 2.650(4)  | 174(6) |
| N(10)-H(0B)...O(28)#5    | 0.81      | 2.20      | 2.956(7)  | 154.6  |
| O(23)-H(23F)...O(28)#5   | 0.85      | 2.10      | 2.942(9)  | 174.1  |
| O(17)-H(17B)...O(30)#6   | 0.85      | 1.95      | 2.763(11) | 160.7  |
| O(17)-H(17B)...O(30')#6  | 0.85      | 1.97      | 2.785(11) | 159.7  |
| O(18)-H(18A)...O(25)#7   | 0.82      | 2.08      | 2.885(5)  | 165.1  |
| O(20)-H(02A)...O(6)#8    | 0.82      | 1.93      | 2.716(4)  | 161.3  |
| O(22)-H(22B)...O(4)#9    | 0.82      | 2.29      | 3.033(4)  | 151.6  |
| O(26)-H(26C)...O(21)#10  | 0.85      | 1.96      | 2.808(5)  | 177.2  |
| O(26)-H(26D)...O(7)#11   | 0.85      | 1.91      | 2.758(5)  | 177.2  |
| O(29)-H(29B)...O(7)#11   | 0.85      | 1.86      | 2.613(5)  | 147.0  |
| O(29')-H(29E)...O(7)#11  | 0.84      | 1.85      | 2.674(13) | 167.1  |
| O(30')-H(30E)...O(18)#11 | 0.85      | 2.46      | 3.296(13) | 170.4  |



|                          |      |      |           |       |
|--------------------------|------|------|-----------|-------|
| O(27)-H(27C)...O(8)#12   | 0.85 | 1.97 | 2.811(14) | 170.0 |
| O(27')-H(27H)...O(8)#12  | 0.85 | 2.00 | 2.835(7)  | 167.5 |
| O(30')-H(30F)...O(26)#12 | 0.85 | 2.35 | 3.190(14) | 169.7 |
| N(10)-H(0A)...O(20)#13   | 0.81 | 2.22 | 3.002(4)  | 165.0 |

---

Symmetry transformations used to generate equivalent atoms:

#1  $-x+2, y+1/2, -z+1$     #2  $-x+1, y-1/2, -z$     #3  $-x+1, y+1/2, -z$

#4  $-x+2, y-1/2, -z+1$     #5  $x+1, y, z$     #6  $-x+1, y-1/2, -z+1$

#7  $x, y-1, z$     #8  $x, y+1, z-1$     #9  $-x+2, y+1/2, -z$

#10  $x, y, z+1$     #11  $x, y+1, z$     #12  $-x+1, y+1/2, -z+1$

#13  $-x+2, y-1/2, -z$
